# Supplementary material for: Fluorescence Polarization Immunoassay for the Determination of T-2 and HT-2 Toxins and Their Glucosides in Wheat
Source: Toxins (Basel). 2019 Jul 1;11(7):380. doi: 10.3390/toxins11070380 (PMC6669535; doi:10.3390/toxins11070380)
Supplement: Supplementary file 1 [file toxins-11-00380-s001.pdf]

# Supplementary Materials: Fluorescence Polarization Immunoassay for the Determination of T-2 and HT-2 Toxins and Their Glucosides in Wheat

Vincenzo Lippolis \*, Anna C. R. Porricelli, Erminia Mancini, Biancamaria Ciasca, Veronica M.T. Lattanzio, Annalisa De Girolamo, Chris M. Maragos, Susan McCormick, Peiwu Li, Antonio F. Logrieco and Michelangelo Pascale

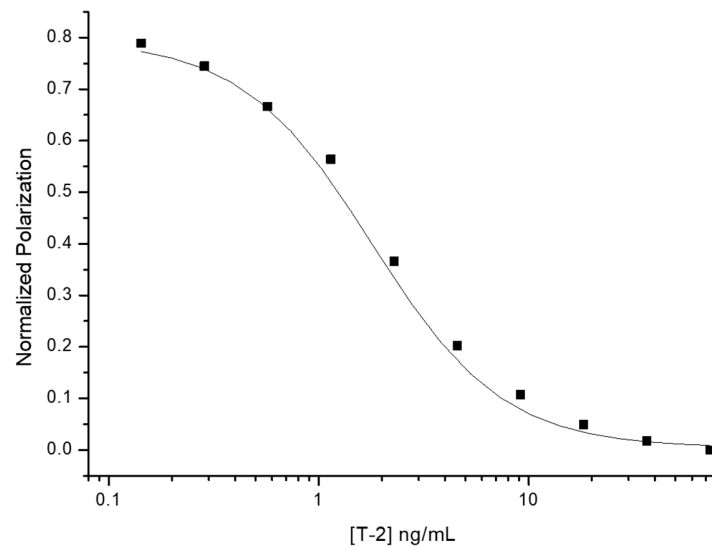

**Figure S1.** Normalized calibration curve of the selected FPIA obtained with mixed standard solutions of T-2 toxin (T-2) in PBS-A solution ([Anti-HT2] = 8  $\mu$ g/mL; [HT2-FL<sub>1a</sub>] obtained after dilution 1:3000 (*v/v*) of the stock solution). Values of *x*-axes are relevant to toxin concentrations in the final test solution.

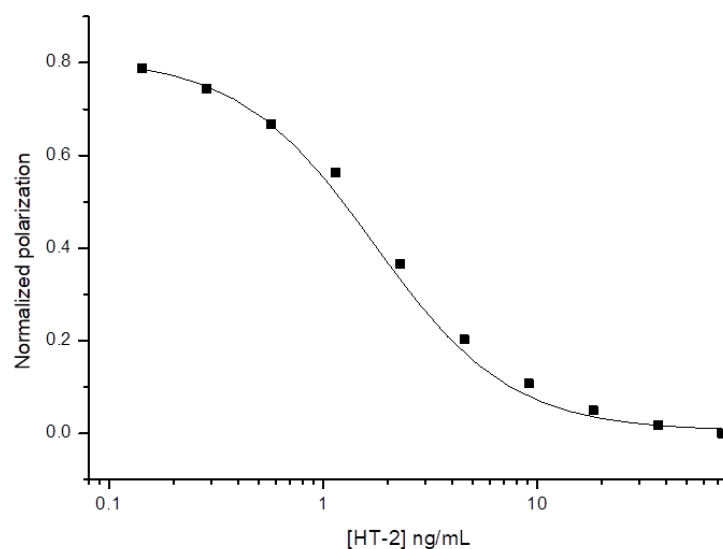

**Figure S2.** Normalized calibration curve of the selected FPIA obtained with mixed standard solutions of HT-2 toxin (HT-2) in PBS-A solution ([Anti-HT2] = 8  $\mu$ g/mL; [HT2-FL<sub>1a</sub>] obtained after dilution 1:3000 (*v/v*) of the stock solution). Values of *x*-axes are relevant to toxin concentrations in the final test solution.

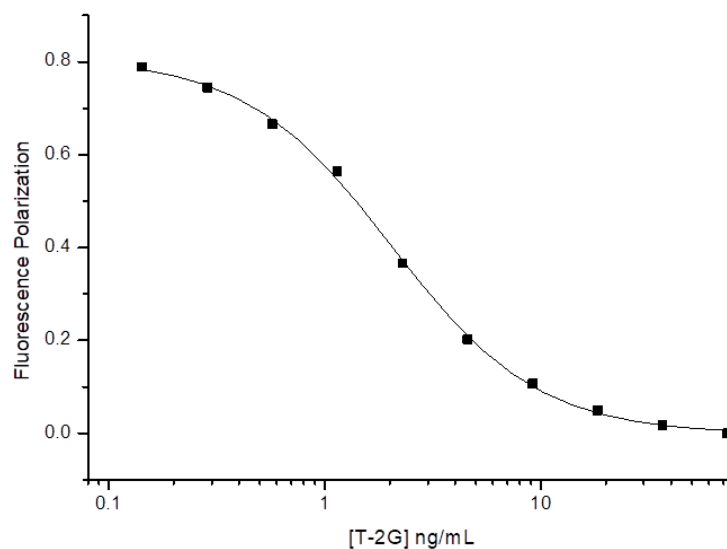

**Figure S3.** Normalized calibration curve of the selected FPIA obtained with mixed standard solutions of T-2 glucoside (T-2G) in PBS-A solution ( $[\text{Anti-HT2}] = 8 \mu\text{g/mL}$ ;  $[\text{HT2-FL}_{1a}]$  obtained after dilution 1:3000 ( $v/v$ ) of the stock solution). Values of  $x$ -axes are relevant to toxin concentrations in the final test solution.

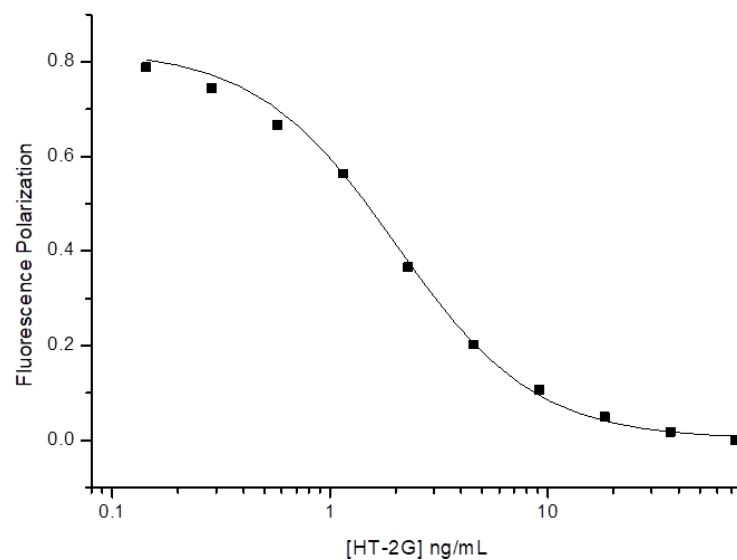

**Figure S4.** Normalized calibration curve of the selected FPIA obtained with mixed standard solutions of HT-2 glucoside (HT-2G) toxin in PBS-A solution ( $[\text{Anti-HT2}] = 8 \mu\text{g/mL}$ ;  $[\text{HT2-FL}_{1a}]$  obtained after dilution 1:3000 ( $v/v$ ) of the stock solution). Values of  $x$ -axes are relevant to toxin concentrations in the final test solution.

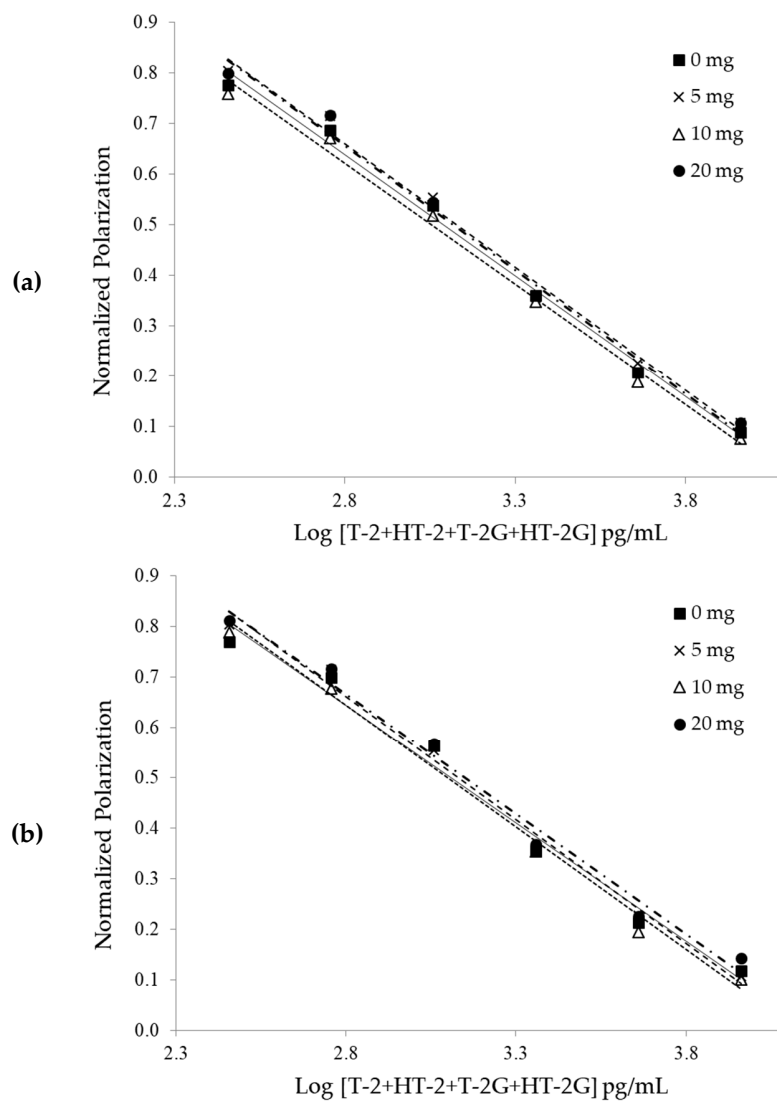

**Figure S5.** Calibration curves (concentration range from 0.3 to 9.1 ng/mL) obtained with mixed standard solutions of T-2, HT-2, T2-glucoside and HT2-glucoside (expressed as sum, ratio 1:1:0.5:0.5) (black square) and spiked diluted extracts of wheat, obtained using Protocol A (a) and Protocol B (b), by analyzing 5 mg (multiplication sign), 10 mg (white triangle) and 20 mg (black circle) of matrix equivalent.
